# Supplementary material
Source: PubMed Central journal article supplement (PMC7900938)
Supplement: jamainternmed-e208588-s001.pdf [file jamainternmed-e208588-s001.pdf]

## Supplementary Online Content

Meyers DE, Jenei K, Chisamore TM, Gyawali B. Evaluation of the clinical benefit of cancer drugs submitted for reimbursement recommendation decisions in Canada. *JAMA Intern Med.* Published online February 22, 2021. doi:10.1001/jamainternmed.2020.8588

**eTable 1.** Examples of Trial Selection in the Present Study

**eTable 2.** Characteristics of the pCODR Submissions for Solid-Tumor Indications Between 2011-2020

**eTable 3.** List of All 104 Oncology Drugs With Final Recommendations From pCODR Between 2011-2020

**eTable 4.** Select Clinical Outcomes of All 104 Oncology Drugs With Final Recommendations From pCODR Between 2011-2020

This supplementary material has been provided by the authors to give readers additional information about their work.

**eTable 1.** Examples of Trial Selection in the Present Study

| Indication Label | Trials Considered (Phase)         | Trial Selected: Reason for Selection                                                                                                                                                                                                                                                                                                            |
|------------------|-----------------------------------|-------------------------------------------------------------------------------------------------------------------------------------------------------------------------------------------------------------------------------------------------------------------------------------------------------------------------------------------------|
| #38              | AVEX (3) & MAX (3)                | <b>AVEX:</b> Specifically enrolled elderly patients not otherwise eligible for oxaliplatin- or irinotecan-based first line therapy. This was the stated indication of the pCODR submission, and thus more directly representative.                                                                                                              |
| #41              | KEYNOTE-006 (3) & KEYNOTE-002 (2) | <b>KEYNOTE-006:</b> On the basis of phase, and directly testing the investigational agent against the Canadian standard of care (Ipilimumab) as opposed to a control arm no longer used in Canada (chemotherapy)                                                                                                                                |
| #90              | PROFILE 1001 (1) & Ox Onc (2)     | <b>PROFILE 1001:</b> As neither trial was randomized, and both lacked comparator groups, PROFILE 1001 was chosen because it was conducted in the USA, Australia and South Korea, as opposed to strictly East Asian countries as with Ox Onc. This made the results of PROFILE 1001 more directly applicable to the Canadian patient population. |

**eTable 2.** Characteristics of the pCODR Submissions for Solid-Tumor Indications Between 2011-2020

| <b>Submission Characteristic</b> | <b>N (%)</b>    |
|----------------------------------|-----------------|
| Total number                     | 104 (100)       |
| Submission Type                  |                 |
| New Indication                   | 54 (51.9)       |
| New Drug                         | 41 (39.4)       |
| Resubmission                     | 9 (8.7)         |
| Drug Class [Unique Drugs]        |                 |
| Small Molecule                   | 48 (46.2), [29] |
| Immune Checkpoint Inhibitor      | 23 (22.1), [8]  |
| Monoclonal Antibody              | 14 (12.5), [8]  |
| Cytotoxic                        | 7 (6.7), [6]    |
| Hormonal                         | 6 (5.8), [4]    |
| Other                            | 6 (5.8), [4]    |
| Tumour Site                      |                 |
| Lung                             | 25 (24.0)       |
| Gastrointestinal                 | 18 (17.3)       |
| Breast                           | 14 (13.5)       |
| Genitourinary                    | 14 (13.5)       |
| Melanoma                         | 14 (13.5)       |
| Gynecological                    | 6 (5.8)         |
| Other                            | 13 (12.5)       |
| Treatment Setting                |                 |
| Advanced/Metastatic              | 97 (93.2)       |
| Adjuvant                         | 6 (5.8)         |
| Neoadjuvant                      | 1 (1.0)         |
| Line of Therapy <sup>^</sup>     |                 |
| 1                                | 37 (38.1)       |
| 2+                               | 56 (57.7)       |
| Maintenance                      | 4 (4.1)         |
| Final Decision                   |                 |
| Conditionally Recommend          | 72 (69.2)       |
| Do Not Recommend                 | 26 (25.0)       |
| Recommend                        | 6 (5.8)         |

<sup>^</sup>If advanced/metastatic treatment setting

**eTable 3.** List of All 104 Oncology Drugs With Final Recommendations From pCODR Between 2011-2020

| Indication Label | Therapeutic              | Disease Setting                               | Decision Date | Recommend?  | Trial#      |
|------------------|--------------------------|-----------------------------------------------|---------------|-------------|-------------|
| 1                | Pazopanib                | RCC – 1L                                      | 20-Jan-12     | Yes         | NCT00334282 |
| 2                | Sunitinib                | pNET                                          | 18-May-12     | Conditional | NCT00428597 |
| 3                | Ipilimumab               | Melanoma – 2L                                 | 02-May-12     | Conditional | NCT00094653 |
| 4                | Vemurafenib              | BRAF V600+<br>Melanoma - 1L                   | 18-Jun-12     | Conditional | NCT01006980 |
| 5                | Eribulin                 | BrCA – 3L                                     | 20-Aug-12     | Conditional | NCT00388726 |
| 6                | Everolimus               | pNET                                          | 17-Sep-12     | Conditional | NCT00510068 |
| 7                | Crizotinib               | ALK+ NSCLC                                    | 22-Oct-12     | No          | NCT00585195 |
| 8                | Pazopanib                | STS – 2L                                      | 14-Dec-12     | No          | NCT00753688 |
| 9                | Axitinib                 | RCC – 2L                                      | 22-Mar-13     | Yes         | NCT00678392 |
| 10               | Everolimus               | BrCA – 2L w/<br>exemestane                    | 11-Apr-13     | Conditional | NCT00863655 |
| 11               | Crizotinib               | ALK+ NSCLC                                    | 17-May-13     | Conditional | NCT00932893 |
| 12               | Pertuzumab               | HER2+ BrCA – 1L<br>w/ taxane &<br>trastuzumab | 19-Aug-13     | Conditional | NCT00567190 |
| 13               | Lapatinib                | HER2+ BrCA w/<br>letrozole                    | 22-Jul-13     | No          | NCT00073528 |
| 14               | Pazopanib                | RCC- 1L                                       | 16-Sep-13     | Yes         | NCT00720941 |
| 15               | Enzalutamide             | CRPC – 2L                                     | 13-Aug-13     | Yes         | NCT00974311 |
| 16               | Trastuzumab<br>emtansine | HER2+ BrCA – 2L                               | 27-Jan-14     | Conditional | NCT00829166 |
| 17               | Dabrafenib               | BRAF V600+<br>Melanoma - 1L                   | 20-Dec-13     | Conditional | NCT01227889 |
| 18               | Regorafenib              | CRC – 2L                                      | 02-Dec-13     | No          | NCT01103323 |
| 19               | Abiraterone              | CRPC – 1L (after<br>ADT)                      | 06-Nov-13     | Conditional | NCT00887198 |
| 20               | Trametinib               | BRAF V600+<br>Melanoma                        | 06-Nov-13     | Conditional | NCT01245062 |
| 21               | Pemetrexed               | NSCLC -1L<br>maintenance                      | 04-Dec-13     | Conditional | NCT00789373 |
| 22               | Afatinib                 | EGFR+ NSCLC –<br>1L                           | 20-May-14     | Conditional | NCT00949650 |
| 23               | Vismodegib               | BCC – 1L                                      | 27-Jan-14     | Conditional | NCT00833417 |
| 24               | Cetuximab                | EGFR+ CRC – 1L<br>w/ FOLFIRI                  | 27-Jan-14     | No          | NCT00433927 |
| 25               | Regorafenib              | GIST – 2L                                     | 20-May-14     | Conditional | NCT01271712 |
| 26               | Aflibercept              | CRC – 2L w/<br>FOLFIRI                        | 22-Sep-14     | No          | NCT00561470 |
| 27               | Nab-paclitaxel           | Pancreatic – 1L w/<br>gemcitabine             | 08-Oct-14     | Conditional | NCT00844649 |
| 28               | Ipilimumab               | Melanoma – 1L                                 | 14-Jan-15     | Conditional | NCT00324155 |
| 29               | Enzalutamide             | CRPC – 1L (after<br>ADT)                      | 08-Jul-15     | Conditional | NCT01212991 |
| 30               | Bevacizumab              | Cervical – 1L w/<br>chemotherapy              | 08-Apr-15     | Conditional | NCT00803062 |

|    |                         |                                                                    |           |             |                |
|----|-------------------------|--------------------------------------------------------------------|-----------|-------------|----------------|
| 31 | Bevacizumab             | Ovarian/Fallopian – 1L w/ paclitaxel & carboplatin                 | 19-Jun-15 | Conditional | ISRCTN91273375 |
| 32 | Pertuzumab              | HER2 <sup>+</sup> BrCA – Neoadjuvant w/ trastuzumab & chemotherapy | 31-Jul-15 | No          | NCT00545688    |
| 33 | Sorafenib               | DTC – 1L (after iodine)                                            | 31-Jul-15 | No          | NCT00984282    |
| 34 | Regorafenib             | CRC – 2 <sup>+</sup> L                                             | 31-Jul-15 | No          | NCT01103323    |
| 35 | Aldesleukin             | Melanoma – 1L (in-transit metastases)                              | 08-Jul-15 | Yes         | NCT00204581    |
| 36 | Dabrafenib & Trametinib | BRAF V600 <sup>+</sup> Melanoma - 1L                               | 06-Aug-15 | Conditional | NCT01584648    |
| 37 | Crizotinib              | ALK <sup>+</sup> NSCLC – 1L                                        | 06-Aug-15 | Conditional | NCT01154140    |
| 38 | Bevacizumab             | CRC – 1L w/ capecitabine                                           | 06-Aug-15 | Conditional | NCT00484939    |
| 39 | Panitumumab             | WT RAS CRC – 1L w/ FOLFOX                                          | 18-Dec-15 | Conditional | NCT00364013    |
| 40 | Ramucirumab             | Gastric/GEJ – 2L +/- paclitaxel                                    | 13-Nov-15 | Conditional | NCT01170663    |
| 41 | Pembrolizumab           | Melanoma                                                           | 01-Dec-15 | Conditional | NCT01866319    |
| 42 | Ceritinib               | ALK <sup>+</sup> NSCLC – 1L or 2L (after crizotinib)               | 18-Dec-15 | No          | NCT01283516    |
| 43 | Nivolumab               | Melanoma – 1 <sup>+</sup> L                                        | 18-Apr-16 | Conditional | NCT01844505    |
| 44 | Bevacizumab             | Ovarian/Fallopian – 2L w/ chemotherapy                             | 20-May-16 | Conditional | NCT00976911    |
| 45 | Nivolumab               | NSCLC – 2L                                                         | 20-Jun-16 | Conditional | NCT01673867    |
| 46 | Cobimetinib             | BRAF V600 <sup>+</sup> Melanoma – 1L w/ vemurafenib                | 18-Jul-16 | Conditional | NCT01689519    |
| 47 | Trabectedin             | STS – 2L                                                           | 22-Aug-16 | No          | NCT01343277    |
| 48 | Nivolumab               | RCC – 2L                                                           | 19-Sep-16 | Conditional | NCT01668784    |
| 49 | Olaparib                | BRCA <sup>+</sup> Ovarian/Fallopian – 1L maintenance               | 17-Oct-16 | No          | NCT00753545    |
| 50 | Osimertinib             | EGFR <sup>+</sup> (T790M) NSCLC – 2L                               | 19-May-17 | Conditional | NCT02151981    |
| 51 | Lenvatinib              | DTC – 1L (after iodine)                                            | 05-Oct-16 | Conditional | NCT01321554    |
| 52 | Pembrolizumab           | PD-L1 <sup>+</sup> NSCLC – 2L                                      | 18-Nov-16 | Conditional | NCT01905657    |
| 53 | Everolimus              | NET                                                                | 16-Dec-16 | Conditional | NCT01524783    |
| 54 | Palbociclib             | ER <sup>+</sup> BrCA – 1L w/ letrozole                             | 06-Dec-16 | Conditional | NCT01740427    |
| 55 | Vandetanib              | MTC                                                                | 17-Apr-17 | Conditional | NCT00410761    |
| 56 | Alectinib               | ALK <sup>+</sup> NSCLC – 2L                                        | 19-May-17 | No          | NCT01871805    |
| 57 | Ceritinib               | ALK <sup>+</sup> NSCLC – 1L or 2L (after crizotinib)               | 05-Apr-17 | Conditional | NCT01828112    |

|    |                          |                                                            |           |             |             |
|----|--------------------------|------------------------------------------------------------|-----------|-------------|-------------|
| 58 | Nivolumab & Ipilimumab   | Melanoma – 1L                                              | 15-Dec-17 | Conditional | NCT01844505 |
| 59 | Pembrolizumab            | PD-L1 <sup>+</sup> NSCLC – 1L                              | 08-Sep-17 | Conditional | NCT02142738 |
| 60 | Nivolumab                | SCCHN – 2L                                                 | 28-Sep-17 | Conditional | NCT02105636 |
| 61 | Olaparib                 | BRCA <sup>+</sup><br>Ovarian/Fallopian<br>– 1L maintenance | 05-Oct-17 | Conditional | NCT01874353 |
| 62 | Dabrafenib & Trametinib  | BRAF V600 <sup>+</sup><br>NSCLC – 2L                       | 17-Nov-17 | No          | NCT01336634 |
| 63 | Irinotecan Liposome      | Pancreatic – 2L w/<br>5-FU & LV                            | 22-Jan-18 | Conditional | NCT01494506 |
| 64 | Fulvestrant              | HER2 <sup>+</sup> BrCA – 1L<br>(postmenopausal)            | 16-Feb-18 | Conditional | NCT01602380 |
| 65 | Pembrolizumab            | UC                                                         | 19-Mar-18 | Conditional | NCT02256436 |
| 66 | Alectinib                | ALK <sup>+</sup> NSCLC – 2L                                | 16-Apr-18 | Conditional | NCT02604342 |
| 67 | Panitumumab              | WT RAS CRC – 1L w/<br>chemotherapy<br>(left-sided tumour)  | 16-Apr-18 | No          | NCT00364013 |
| 68 | Avelumab                 | MCC – 2L                                                   | 06-Apr-18 | Conditional | NCT02155647 |
| 69 | Regorafenib              | HCC – 2L                                                   | 03-May-18 | Conditional | NCT01774344 |
| 70 | Ribociclib               | ER <sup>+</sup> BrCA – 1L                                  | 03-May-18 | Conditional | NCT01958021 |
| 71 | Olaratumab               | STS – 1L w/<br>doxorubicin                                 | 03-May-18 | Conditional | NCT01185964 |
| 72 | Trifluridine & Tipiracil | CRC – 2L                                                   | 23-Jul-18 | No          | NCT01607957 |
| 73 | Atezolizumab             | NSCLC – 2L                                                 | 06-Jul-18 | Conditional | NCT02008227 |
| 74 | Alectinib                | ALK <sup>+</sup> NSCLC – 1L                                | 10-Aug-18 | Conditional | NCT02075840 |
| 75 | Pertuzumab & Trastuzumab | HER2 <sup>+</sup> BrCA -<br>Adjuvant                       | 14-Dec-18 | No          | NCT01358877 |
| 76 | Apalutamide              | CRPC – 1L (non-<br>metastatic)                             | 16-Nov-18 | Conditional | NCT01946204 |
| 77 | Nivolumab & Ipilimumab   | RCC – 1L<br>(intermediate/poor<br>risk)                    | 16-Nov-18 | Conditional | NCT02231749 |
| 78 | Nivolumab                | HCC – 2L                                                   | 14-Dec-18 | No          | NCT01658878 |
| 79 | Osimertinib              | EGFR <sup>+</sup> NSCLC – 1L                               | 21-Jan-19 | Conditional | NCT02296125 |
| 80 | Lenvatinib               | RCC – 2L w/<br>everolimus                                  | 21-Jan-19 | No          | NCT01136733 |
| 81 | Lutetium Lu 177          | SR <sup>+</sup> GEP-NET – 2L                               | 19-Aug-19 | Conditional | NCT01578239 |
| 82 | Nivolumab                | Melanoma -<br>Adjuvant                                     | 22-Mar-19 | Conditional | NCT02388906 |
| 83 | Pembrolizumab            | NSCLC (non-<br>squamous) – 1L w/<br>chemotherapy           | 17-Jun-19 | Conditional | NCT02578680 |
| 84 | Cabozantinib             | RCC – 2L                                                   | 07-Mar-19 | Conditional | NCT01865747 |
| 85 | Dacomitinib              | EGFR <sup>+</sup> NSCLC – 1L                               | 17-Jun-19 | Conditional | NCT01774721 |

|     |                          |                                                     |           |             |                                             |
|-----|--------------------------|-----------------------------------------------------|-----------|-------------|---------------------------------------------|
| 86  | Dabrafenib & Trametinib  | BRAF V600 <sup>+</sup> Melanoma – Adjuvant          | 21-May-19 | Conditional | NCT01682083                                 |
| 87  | Durvalumab               | NSCLC – Maintenance (chemo+RT)                      | 21-May-19 | Conditional | NCT02125461                                 |
| 88  | Enzalutamide             | CRPC – 1L (non-metastatic)                          | 10-Apr-19 | Conditional | NCT02003924                                 |
| 89  | Palbociclib              | HR <sup>+</sup> BrCA – 2L w/ fulvestrant            | 21-May-19 | Conditional | NCT01942135                                 |
| 90  | Crizotinib               | ROSI <sup>+</sup> NSCLC – 1L                        | 07-Jun-19 | Conditional | NCT00585195                                 |
| 91  | Abemaciclib              | HR <sup>+</sup> BrCA                                | 22-Jul-19 | Conditional | NCT02246621                                 |
| 92  | Brigatinib               | ALK <sup>+</sup> NSCLC – 2L                         | 19-Aug-19 | No          | NCT02094573                                 |
| 93  | Pembrolizumab            | Melanoma - Adjuvant                                 | 19-Aug-19 | Conditional | NCT02362594                                 |
| 94  | Trifluridine & Tipiracil | CRC – 2L                                            | 16-Sep-19 | No          | NCT03306394                                 |
| 95  | Lenvatinib               | HCC – 1L                                            | 09-Aug-19 | Conditional | NCT01761266                                 |
| 96  | Pembrolizumab            | NSCLC (squamous) – 1L w/ chemotherapy               | 20-Jan-20 | Conditional | NCT02775435                                 |
| 97  | Pembrolizumab            | UC – 1L                                             | 21-Oct-19 | No          | NCT02335424                                 |
| 98  | Larotrectinib            | NTRK <sup>+</sup> Tumours – 1 <sup>+</sup> L        | 15-Nov-19 | No          | NCT02122913,<br>NCT02637687,<br>NCT02576431 |
| 99  | Atezolizumab             | ES-SCLC – 1L w/ platinum chemotherapy               | 14-Feb-20 | No          | NCT02763579                                 |
| 100 | Neratinib                | HER2 <sup>+</sup> BrCA – Adjuvant Maintenance       | 20-Dec-19 | No          | NCT00878709                                 |
| 101 | Olaparib                 | BRCA <sup>+</sup> Ovarian/Fallopian -1L maintenance | 20-Dec-19 | Conditional | NCT01844986                                 |
| 102 | Lorlatinib               | ALK <sup>+</sup> NSCLC – 2 <sup>+</sup> L           | 14-Feb-20 | No          | NCT01970865                                 |
| 103 | Trastuzumab emtansine    | HER2 <sup>+</sup> BrCA – Adjuvant                   | 06-Feb-20 | Yes         | NCT01772472                                 |
| 104 | Cemiplimab               | SCC – 1L                                            | 06-Feb-20 | Conditional | NCT02760498                                 |

Note: Although pCODR started in 2011, no decisions were issued until 2012. Therefore, the decision dates in this table start from 2012.

**eTable 4.** Select Clinical Outcomes of All 104 Oncology Drugs With Final Recommendations From pCODR Between 2011-2020

| Indication Label | Therapeutic             | PFS Gain          | OS Gain           | Recommended? |
|------------------|-------------------------|-------------------|-------------------|--------------|
| 1                | Pazopanib               | 5.0               | 0                 | Yes          |
| 2                | Sunitinib               | 5.9               | Unknown Benefit   | Conditional  |
| 3                | Ipilimumab              | 0.0               | 3.6               | Conditional  |
| 4                | Vemurafenib             | 3.7               | 3.6               | Conditional  |
| 5                | Eribulin                | 0.0               | 2.5               | Conditional  |
| 6                | Everolimus              | 6.4               | 0                 | Conditional  |
| 7                | Crizotinib              | Not assessed      | Not assessed      | No           |
| 8                | Pazopanib               | 3.0               | 0                 | No           |
| 9                | Axitinib                | 2.0               | 0                 | Yes          |
| 10               | Everolimus              | 6.5               | Not assessed      | Conditional  |
| 11               | Crizotinib              | 4.7               | 0                 | Conditional  |
| 12               | Pertuzumab              | 6.1               | 19.4 <sup>^</sup> | Conditional  |
| 13               | Lapatinib               | 5.2               | 0                 | No           |
| 14               | Pazopanib               | 0.0               | 0                 | Yes          |
| 15               | Enzalutamide            | 5.4               | 4.8               | Yes          |
| 16               | Trastuzumab emtansine   | 5.8               | 3.2               | Conditional  |
| 17               | Dabrafenib              | 2.4               | 0                 | Conditional  |
| 18               | Regorafenib             | 0.2               | 1.4               | No           |
| 19               | Abiraterone             | 8.2               | 9.1 <sup>^</sup>  | Conditional  |
| 20               | Trametinib              | 3.3               | Unknown Benefit   | Conditional  |
| 21               | Pemetrexed              | 1.3               | 2.9               | Conditional  |
| 22               | Afatinib                | 4.2               | 0                 | Conditional  |
| 23               | Vismodegib              | Not assessed      | Not assessed      | Conditional  |
| 24               | Cetuximab               | 0.0               | 3.7               | No           |
| 25               | Regorafenib             | 3.9               | 0                 | Conditional  |
| 26               | Aflibercept             | 2.2               | 1.4               | No           |
| 27               | Nab-paclitaxel          | 1.8               | 1.8               | Conditional  |
| 28               | Ipilimumab              | 0.2               | 2.1               | Conditional  |
| 29               | Enzalutamide            | 16.6 <sup>^</sup> | 2.2               | Conditional  |
| 30               | Bevacizumab             | 2.3               | 3.7               | Conditional  |
| 31               | Bevacizumab             | 1.7               | 0                 | Conditional  |
| 32               | Pertuzumab              | Not assessed      | 0                 | No           |
| 33               | Sorafenib               | 5.0               | 0                 | No           |
| 34               | Regorafenib             | 0.2               | 1.4               | No           |
| 35               | Aldesleukin             | Not assessed      | Not assessed      | Yes          |
| 36               | Dabrafenib & Trametinib | 0.5               | Unknown Benefit   | Conditional  |
| 37               | Crizotinib              | 3.9               | 0                 | Conditional  |
| 38               | Bevacizumab             | 4.0               | 0                 | Conditional  |
| 39               | Panitumumab             | 2.2               | 5.6               | Conditional  |
| 40               | Ramucirumab             | 1.5               | 2.2               | Conditional  |
| 41               | Pembrolizumab           | 2.7               | Unknown Benefit   | Conditional  |
| 42               | Ceritinib               | Not assessed      | Not assessed      | No           |
| 43               | Nivolumab               | 4.0               | Not assessed      | Conditional  |
| 44               | Bevacizumab             | 3.3               | 0                 | Conditional  |
| 45               | Nivolumab               | 0.0               | 2.8               | Conditional  |
| 46               | Cobimetinib             | 5.1               | 4.9               | Conditional  |
| 47               | Trabectedin             | 2.7               | 0                 | No           |



|     |                          |                   |                   |             |
|-----|--------------------------|-------------------|-------------------|-------------|
| 48  | Nivolumab                | 0.0               | 5.4               | Conditional |
| 49  | Olaparib                 | 3.6               | 0                 | No          |
| 50  | Osimertinib              | 5.7               | Not assessed      | Conditional |
| 51  | Lenvatinib               | 14.7              | 0                 | Conditional |
| 52  | Pembrolizumab            | 0.0               | 1.9               | Conditional |
| 53  | Everolimus               | 7.1               | 0                 | Conditional |
| 54  | Palbociclib              | 10.3              | Not assessed      | Conditional |
| 55  | Vandetanib               | 11.2              | 0                 | Conditional |
| 56  | Alectinib                | Not assessed      | Not assessed      | No          |
| 57  | Ceritinib                | 3.8               | 0                 | Conditional |
| 58  | Nivolumab & Ipilimumab   | 8.6               | 16.4 <sup>^</sup> | Conditional |
| 59  | Pembrolizumab            | 3.6               | Unknown Benefit   | Conditional |
| 60  | Nivolumab                | 0.0               | 2.4               | Conditional |
| 61  | Olaparib                 | 13.6              | 0                 | Conditional |
| 62  | Dabrafenib & Trametinib  | Not assessed      | Not assessed      | No          |
| 63  | Irinotecan Liposome      | 1.6               | 1.9               | Conditional |
| 64  | Fulvestrant              | 2.8               | 0                 | Conditional |
| 65  | Pembrolizumab            | 0.0               | 2.9               | Conditional |
| 66  | Alectinib                | 8.2               | Not assessed      | Conditional |
| 67  | Panitumumab              | 3.7               | 6.7               | No          |
| 68  | Avelumab                 | Not assessed      | Not assessed      | Conditional |
| 69  | Regorafenib              | 1.6               | 2.8               | Conditional |
| 70  | Ribociclib               | 9.3               | 0                 | Conditional |
| 71  | Olaratumab               | 0.0               | 11.8              | Conditional |
| 72  | Trifluridine & Tipiracil | 0.3               | 1.8               | No          |
| 73  | Atezolizumab             | 0.0               | 4.2               | Conditional |
| 74  | Alectinib                | 14.7 <sup>^</sup> | 0                 | Conditional |
| 75  | Pertuzumab & Trastuzumab | Not assessed      | 0                 | No          |
| 76  | Apalutamide              | 25.8              | 0                 | Conditional |
| 77  | Nivolumab & Ipilimumab   | 0.0               | 15.3 <sup>^</sup> | Conditional |
| 78  | Nivolumab                | Not assessed      | Not assessed      | No          |
| 79  | Osimertinib              | 8.7               | Unknown Benefit   | Conditional |
| 80  | Lenvatinib               | 9.1               | 10.1              | No          |
| 81  | Lutetium Lu 177          | 31.6 <sup>^</sup> | Unknown Benefit   | Conditional |
| 82  | Nivolumab                | Not assessed      | Not assessed      | Conditional |
| 83  | Pembrolizumab            | 3.9               | 11.8 <sup>^</sup> | Conditional |
| 84  | Cabozantinib             | 3.6               | 4.9               | Conditional |
| 85  | Dacomitinib              | 5.5               | 7.3               | Conditional |
| 86  | Dabrafenib & Trametinib  | Not assessed      | Unknown Benefit   | Conditional |
| 87  | Durvalumab               | 11.6              | 13.5 <sup>^</sup> | Conditional |
| 88  | Enzalutamide             | Not assessed      | 0                 | Conditional |
| 89  | Palbociclib              | 5.4               | 0                 | Conditional |
| 90  | Crizotinib               | Not assessed      | Not assessed      | Conditional |
| 91  | Abemaciclib              | 13.4              | Not assessed      | Conditional |
| 92  | Brigatinib               | Not assessed      | Not assessed      | No          |
| 93  | Pembrolizumab            | Not assessed      | Not assessed      | Conditional |
| 94  | Trifluridine & Tipiracil | Not assessed      | Not assessed      | No          |
| 95  | Lenvatinib               | 3.7               | 0                 | Conditional |
| 96  | Pembrolizumab            | 1.6               | 4.6               | Conditional |
| 97  | Pembrolizumab            | Not assessed      | Not assessed      | No          |
| 98  | Larotrectinib            | Not assessed      | Not assessed      | No          |
| 99  | Atezolizumab             | 0.9               | 2                 | No          |
| 100 | Neratinib                | Not assessed      | Not assessed      | No          |

|     |                       |                   |              |             |
|-----|-----------------------|-------------------|--------------|-------------|
| 101 | Olaparib              | 32.2 <sup>^</sup> | 0            | Conditional |
| 102 | Lorlatinib            | Not assessed      | Not assessed | No          |
| 103 | Trastuzumab emtansine | Not assessed      | 0            | Yes         |
| 104 | Cemiplimab            | Not assessed      | Not assessed | Conditional |

PFS = progression-free survival, OS = overall survival.

<sup>^</sup>Indicates estimate of clinical outcome based on available data.
